# Supplementary material for: Barriers and facilitators of physical activity in knee and hip osteoarthritis: a systematic review of qualitative evidence
Source: PubMed Central journal article supplement (PMC5770915; doi:10.1136/bmjopen-2017-017042), 2017-12-26
Supplement: bmjopen-2017-017042supp002.pdf [file bmjopen-2017-017042supp002.pdf]

## Supplement 2. Search strategy for Medline

Draft MEDLINE search- Ovid interface

- 1 osteoarthritis.mp. or exp Osteoarthritis, Hip/ or exp Osteoarthritis/ or exp Osteoarthritis, Knee/
- 2 (osteoarthriti\* or osteo-arthriti\* or osteoarthrotic or osteoarthros\*).ti,ab.
- 3 (coxarthrosis or gonarthrosis).ti,ab.
- 4 "knee pain".mp.
- 5 "hip pain".mp.
- 6 "lower limb".mp.
- 7 exp Lower Extremity/ or "lower extremit\*".mp.
- 8 (degenerative adj2 arthritis).ti,ab.
- 9 1 or 2 or 3 or 4 or 5 or 6 or 7 or 8
- 10 physical activity.mp. or exp Motor Activity/
- 11 exp Exercise/ or exp Exercise Therapy/ or exercise.mp.
- 12 exp Sports/ or sports.mp.
- 13 exp Life Style/ or exp Sedentary Lifestyle/ or sedentary.mp.
- 14 "non-exercis\*".ti,ab.
- 15 "activities of daily living".mp. or exp "Activities of Daily Living"/
- 16 10 or 11 or 12 or 13 or 14 or 15  
(maintain\* or maintenance or support\* or ongoing or "on-going" or adherence or  
17 reforc\* or comply\* or compliance or "long-term" or adoption or engagement or  
avoidance or boost\* or refresh\* or remind\* or promotion or promot\* or "physical  
activity uptake" or "behavio\* change" or "lifestyle change").ti,ab.
- 18 (barrier\* or impediment or limit\* or facilitator\* or enablers or enabl\* or motivators or  
motivat\* or influenc\* or factors or determinants).ti,ab.
- 19 facilitator\*.mp.
- 20 barrier\*.mp.
- 21 adherence.mp.
- 22 exp Motivation/ or motivators.mp.
- 23 social support.mp. or exp Social Support/
- 24 17 or 18 or 19 or 20 or 21 or 22 or 23
- 25 exp Qualitative Research/ or qualitative.mp.  
(interview\* or theme\* or experience).mp. [mp=title, abstract, original title, name of  
26 substance word, subject heading word, keyword heading word, protocol supplementary  
concept word, rare disease supplementary concept word, unique identifier]
- 27 ("content analysis" or "grounded theory" or "thematic analysis" or "phenomenological  
analysis" or phenomenolog\* or narrative\* or discourse or ethnograph\*).ti,ab.
- 28 (("semi-structured" or semistructured or unstructured or informal or "in-depth" or  
indepth or "face-to-face" or structured or guide) adj3 (interview\* or discussion\* or

questionnaire\*)),ti,ab.

29 (focus group\* or interview\* or fieldwork or "field work" or triangulation or "data saturation" or "key informant").ti,ab.

30 25 or 26 or 27 or 28 or 29

31 9 and 16 and 24 and 30
